# Supplementary material
Source: Springer Nature journal article supplement (https://www.springermedizin.de/resource/supplementary/13020_2010_76_MOESM2_ESM.pdf/9640924)
Supplement: MOESM2 [file 9640924]

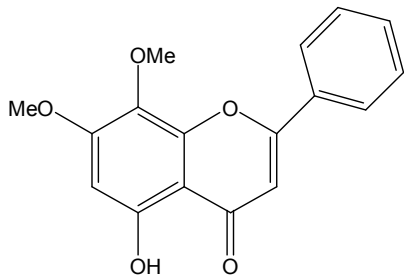

**5-hydroxy-7,8-dimethoxyflavone**

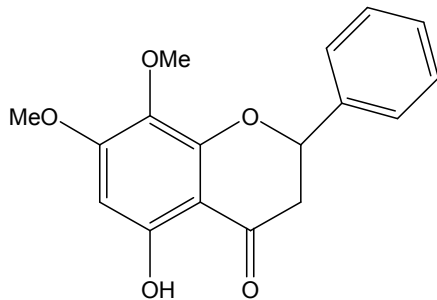

**5-hydroxy-7,8-dimethoxyflavanone**

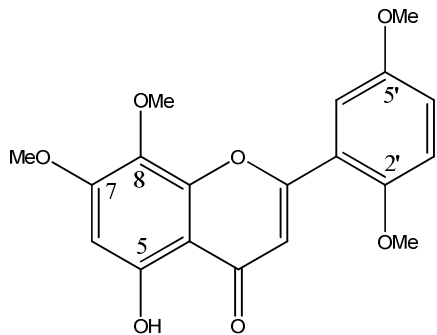

**5-hydroxy-7,8,2',5'-tetramethoxyflavone**

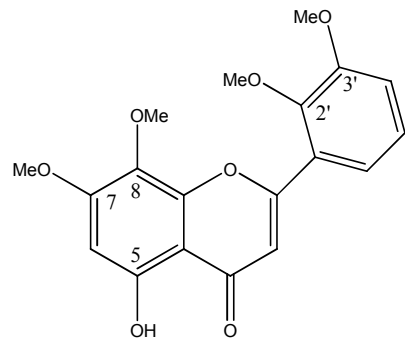

**5-hydroxy-7,8,2',3'-tetramethoxyflavone**
